# Supplementary material for: InSAR-derived seasonal subsidence rates reflect spatial soil moisture patterns in Arctic lowland permafrost regions
Source: Copernicus journal article supplement (doi:10.5194/egusphere-2024-2356), 2024-09-20
Supplement: Supplementary file 1 [file egusphere-2024-2356-supplement.pdf]

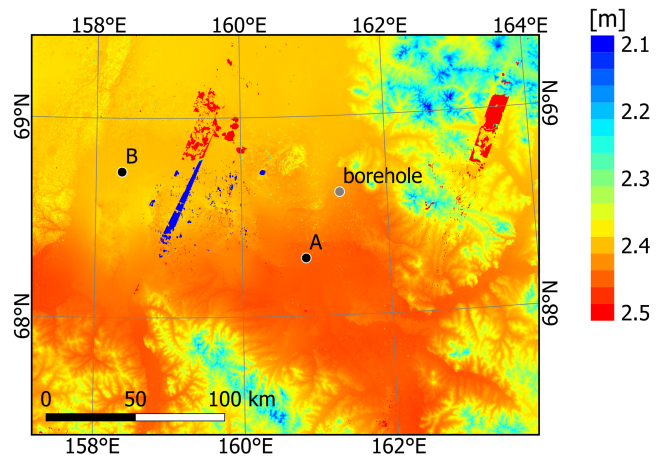

(a)

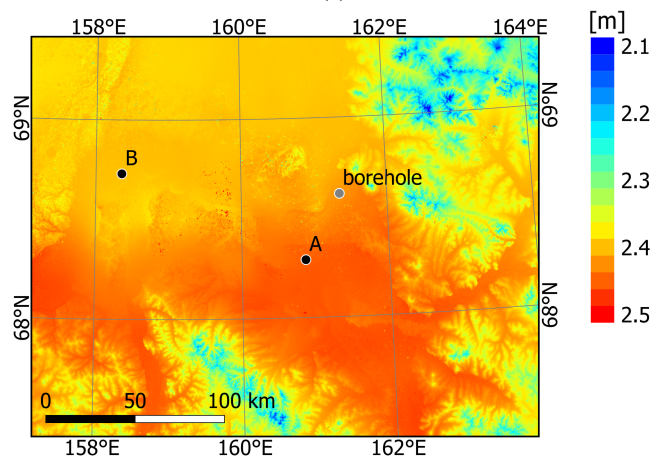

(b)

**Figure S 1.** GACOS tropospheric delay map (Yu et al., 2018) for the Chersky region (10.08.2017). (a) artefacts stemming from ASTER DEM, (b) applied artefact correction

## References

Yu, C., Li, Z., Penna, N. T., and Crippa, P.: Generic Atmospheric Correction Model for Interferometric Synthetic Aperture Radar Observations, *Journal of Geophysical Research: Solid Earth*, 123, 9202–9222, <https://doi.org/https://doi.org/10.1029/2017JB015305>, 2018.

**Table S 1.** Acquisition dates of the Sentinel-1 images per study region used in this study.

| Chersky                                                                                                                    | Inuvik                                                                                                                                                 | Yamal                                                                                                                      | Tazovsky                                                                                                     |
|----------------------------------------------------------------------------------------------------------------------------|--------------------------------------------------------------------------------------------------------------------------------------------------------|----------------------------------------------------------------------------------------------------------------------------|--------------------------------------------------------------------------------------------------------------|
|                                                                                                                            |                                                                                                                                                        | 07/07/2016<br>19/07/2016<br>12/08/2016<br>24/08/2016<br>05/09/2016<br>17/09/2016<br>05/10/2016                             |                                                                                                              |
| 23/06/2017<br>05/07/2017<br>17/07/2017<br>29/07/2017<br>10/08/2017<br>22/08/2017<br>03/09/2017                             |                                                                                                                                                        | 14/06/2017<br>26/06/2017<br>08/07/2017<br>20/07/2017<br>01/08/2017<br>25/08/2017<br>06/09/2017<br>18/09/2017               |                                                                                                              |
| 12/07/2018<br>24/07/2018<br>05/08/2018<br>17/08/2018<br>29/08/2018<br>10/09/2018<br>22/09/2018                             | 30/06/2018<br>12/07/2018<br>24/07/2018<br>05/08/2018                                                                                                   | 21/06/2018<br>03/07/2018<br>15/07/2018<br>08/08/2018<br>20/08/2018<br>01/09/2018<br>07/10/2018                             |                                                                                                              |
| 19/07/2019<br>31/07/2019<br>12/08/2019<br>24/08/2019<br>05/09/2019<br>17/09/2019                                           | 13/06/2019<br>25/06/2019<br>07/07/2019<br>19/07/2019<br>31/07/2019<br>12/08/2019<br>24/08/2019<br>05/09/2019<br>17/09/2019                             |                                                                                                                            | 10/06/2019<br>22/06/2019<br>04/07/2019<br>16/07/2019<br>28/07/2019<br>02/09/2019<br>14/09/2019               |
| 19/06/2020<br>01/07/2020<br>13/07/2020<br>25/07/2020<br>06/08/2020<br>18/08/2020<br>30/08/2020<br>11/09/2020<br>23/09/2020 | 26/05/2020<br>07/06/2020<br>19/06/2020<br>01/07/2020<br>13/07/2020<br>25/07/2020<br>06/08/2020<br>18/08/2020<br>30/08/2020<br>11/09/2020<br>23/09/2020 |                                                                                                                            | 23/05/2020<br>04/06/2020<br>16/06/2020<br>28/06/2020<br>10/07/2020<br>15/08/2020<br>08/09/2020<br>20/09/2020 |
| 14/06/2021<br>26/06/2021<br>08/07/2021<br>20/07/2021<br>01/08/2021<br>13/08/2021<br>25/08/2021                             | 21/05/2021<br>14/06/2021<br>26/06/2021<br>08/07/2021<br>20/07/2021<br>01/08/2021<br>13/08/2021<br>25/08/2021<br>06/09/2021<br>18/09/2021               | 24/05/2021<br>05/06/2021<br>17/06/2021<br>29/06/2021<br>11/07/2021<br>23/07/2021<br>04/08/2021<br>09/09/2021<br>21/09/2021 |                                                                                                              |
|                                                                                                                            | 28/05/2022<br>09/06/2022<br>21/06/2022<br>03/07/2022<br>15/07/2022<br>08/08/2022<br>20/08/2022<br>01/09/2022<br>13/09/2022                             |                                                                                                                            |                                                                                                              |
|                                                                                                                            | 23/05/2023<br>04/06/2023<br>16/06/2023<br>28/06/2023<br>10/07/2023<br>22/07/2023<br>15/08/2023<br>08/09/2023<br>20/09/2023                             |                                                                                                                            |                                                                                                              |

**Table S 2.** Sentinel-1 paths and frames per study region used in this study (see Table S 1)

|       | Chersky | Inuvik | Yamal | Tazovsky |
|-------|---------|--------|-------|----------|
| Path  | 31      | 108    | 64    | 151      |
| Frame | 363     | 221    | 358   | 366      |

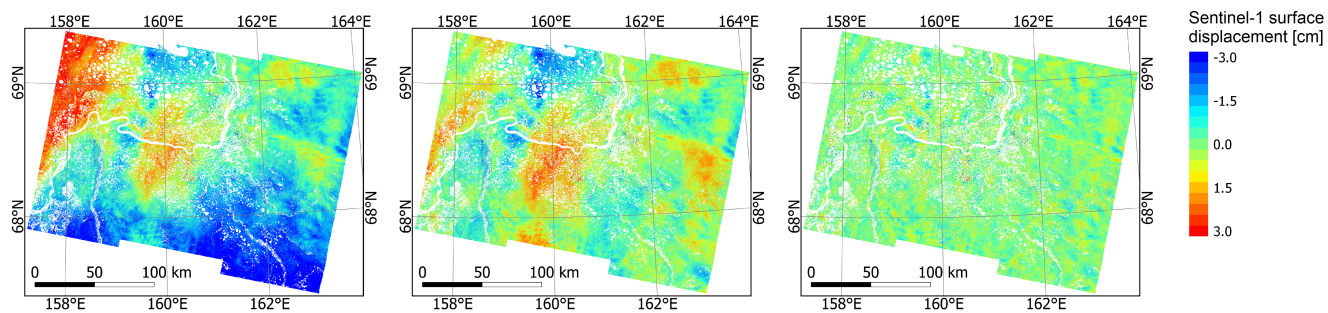

**Figure S 2.** Comparison of spatial filter radius size for the Chersky region (maps of interferometric phase expressed as displacement for 23.06.2017 - 05.07.2017). Left: no filter, middle: filter radius about 60km, right filter radius about 6km
