# Supplementary material for: InSAR-derived seasonal subsidence rates reflect spatial soil moisture patterns in Arctic lowland permafrost regions
Source: Copernicus journal article supplement (doi:10.5194/egusphere-2024-2356), 2024-09-20
Supplement: Supplementary file [file egusphere-2024-2356-AC2-supplement.pdf]

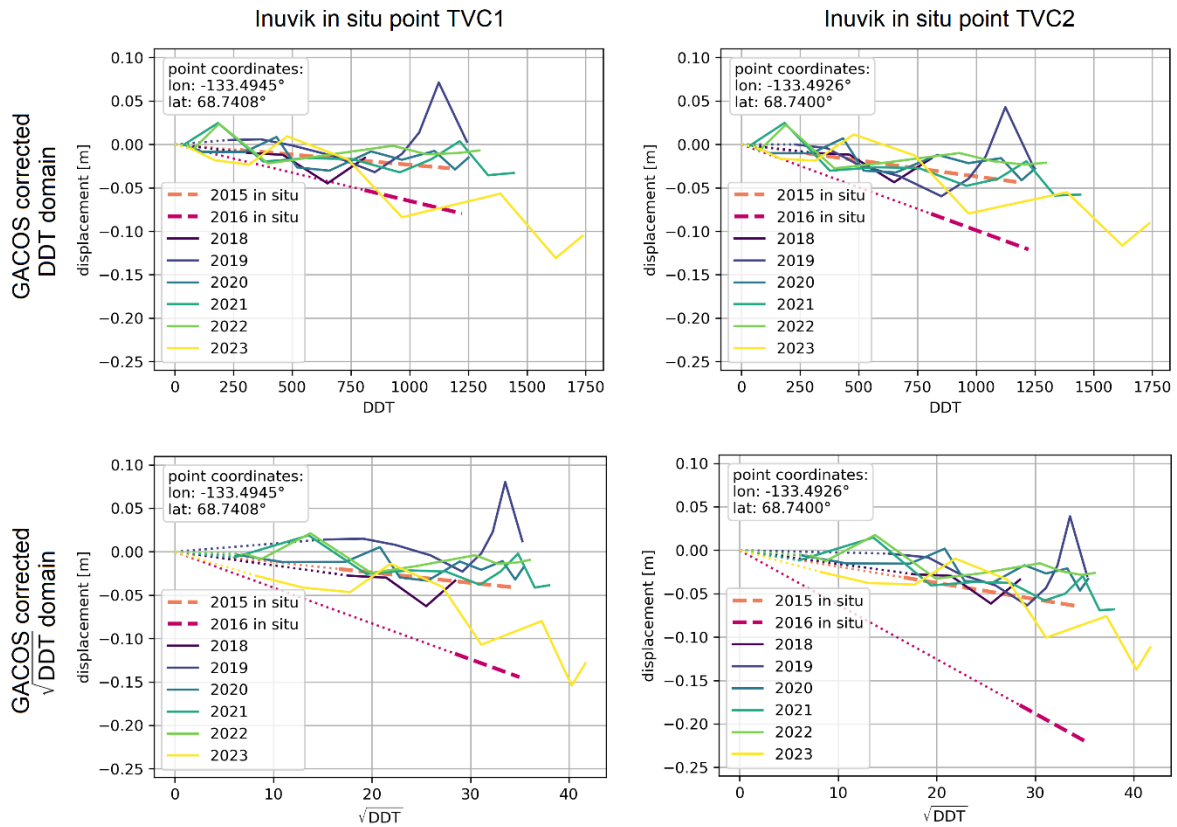

Figure 1: Comparison of displacement time series for two sample points with in situ subsidence measurements for the years 2015 and 2016 near the Trail Valley Creek (TVC) research station (Inuvik region). The top figures display GACOS corrected results in the DDT domain while the lower figures show GACOS corrected results in the  $\sqrt{DDT}$  domain.
